# Supplementary material for: Practical Use of Immortalized Cells in Medicine: Current Advances and Future Perspectives
Source: MDPI journal article supplement (doi:10.3390/ijms241612716), 2023-08-12
Supplement: s1 [file ijms-2490040-supplementary.pdf › ijms-2490040-supplementary.pdf]

**Supplementary Table S1: List of cells and approaches mentioned in the review.**

| Cell line    | Cell type                                                   | Immortalization method              | Immortalization reversability | Use case                                                                                           | Stage                                                                                           | References        |
|--------------|-------------------------------------------------------------|-------------------------------------|-------------------------------|----------------------------------------------------------------------------------------------------|-------------------------------------------------------------------------------------------------|-------------------|
| Regeneration |                                                             |                                     |                               |                                                                                                    |                                                                                                 |                   |
| CTX0E03      | Neural fetal stem cells                                     | c-MycER <sup>TAM</sup>              | +                             | Regeneration after ischemic stroke, lower limb ischemia; Alzheimer's disease, Huntington's disease | Preclinical, clinical trials phase I, IIa with published results, IIb without published results | [36–38,41–43,132] |
| HK532-IGF-1  | Neural fetal stem cells                                     | c-Myc linked with estrogen receptor | +                             | Therapy for Alzheimer's disease                                                                    | Preclinical in vivo                                                                             | [47–49]           |
| HB1.F3.BDNF  | Neural fetal stem cells                                     | v-Myc                               | -                             | Therapy of hemorrhagic stroke, Huntington's disease, spinal cord injury                            | Preclinical in vivo                                                                             | [50–53]           |
| HiDEP, HUDEP | Induced pluripotent cells (HiDEP), cord blood cells (HUDEP) | Tat-inducible HPV16 E6/E7           | +                             | Erythroid progenitors are sources of cells for blood replacement procedures.                       | Establishment                                                                                   | [54]              |
| imERYPC      | Embryonic stem cells                                        | Dox-inducible                       | +                             |                                                                                                    | Establishment                                                                                   | [55]              |



|                                                           |                                                          |                     |   |                                                                                        |                                                     |         |
|-----------------------------------------------------------|----------------------------------------------------------|---------------------|---|----------------------------------------------------------------------------------------|-----------------------------------------------------|---------|
| SV40-TK-hfBMSC                                            | Fetal mesenchymal stem cells                             | SV40 T-antigen      | - | Targeted therapy of prostate tumors using cytosine deaminase delivery                  | Preclinical in vivo                                 | [72]    |
| HB1.F3.CD                                                 | Neural stem cells                                        | v-Myc               | - | Targeted therapy of various tumors using cytosine deaminase delivery                   | Preclinical in vivo, clinical trial phase I         | [73–77] |
| IAST/GAL                                                  | Rat astrocytes, modified for galanin expression          | SV40 T-antigen      | – | Therapy of pain syndrome when implantated in the subarachnoid space of the spinal cord | Preclinical in vivo                                 | [80,81] |
| IAST/hPPE                                                 | Rat astrocytes, modified for preproencephalin expression | SV40 T-antigen      | - |                                                                                        | Preclinical in vivo                                 | [82]    |
| hTERT-BMSCs/Tet-on/GAL                                    | Bone marrow MSCs, modified for galanin expression        | Tet-inducible hTERT | + |                                                                                        | Preclinical in vivo                                 | [83]    |
| hTERT & CDK4 human myoblasts for encapsulation technology | Human myoblasts modified to produce GM-CSF               | hTERT, CDK4         | - | Encapsulated GM-CSF-producing cells used for tumor therapy                             | Preclinical in vivo, planned phase I clinical trial | [86]    |

| Secretome                         |                                                           |                        |   |                                                                  |                      |         |
|-----------------------------------|-----------------------------------------------------------|------------------------|---|------------------------------------------------------------------|----------------------|---------|
| Sca-1+/CD31-CSCs <sup>hTERT</sup> | Resident mouse heart stem cells                           | hTERT                  | - | Use of secretome in the treatment of acute myocardial infarction | Preclinical in vivo  | [89,90] |
| SC1 <sup>GFP/SCX</sup>            | Mesenchymal stem cells                                    | hTERT                  | - | Use of secretome for muscle tissue regeneration                  | Preclinical in vitro | [91]    |
| ASC52Telo                         | Mesenchymal stem cells                                    | hTERT                  | - | Use of secretome for fibrosis prevention                         | Preclinical in vitro | [92]    |
| HATMSCs                           | Mesenchymal stem cells                                    | hTERT                  | - | Use of secretome for the treatment of chronic ulcers             | Preclinical in vitro | [93,94] |
| S1-ADSC                           | Mesenchymal stem cells                                    | hTERT                  | - | Use of secretome for skin regeneration                           | Preclinical in vitro | [95]    |
| OMLP-PC <sub>1</sub>              | Progenitor cells of the lamina propria of the oral mucosa | hTERT                  | - | Use of secretome for scar-free tissue regeneration               | Preclinical in vivo  | [96]    |
| CTX0E03                           | Neural stem cells                                         | c-MycER <sup>TAM</sup> | + | Use of the secretome of differentiating cells as a               | Preclinical in vivo  | [97]    |

|                                    |                                                |                                                                                                                    |     |                                                                                                   |                                              |                |
|------------------------------------|------------------------------------------------|--------------------------------------------------------------------------------------------------------------------|-----|---------------------------------------------------------------------------------------------------|----------------------------------------------|----------------|
|                                    |                                                |                                                                                                                    |     | cardioprotective agent                                                                            |                                              |                |
| Different immortalized MSCs        | Mesenchymal stem cells                         |                                                                                                                    | -   | Use of exosomes as a neuroprotective agent, for psoriasis treatment                               | Preclinical in vivo, phase I clinical trial  | [98–101]       |
| Bioartificial organs               |                                                |                                                                                                                    |     |                                                                                                   |                                              |                |
| ciPTEC                             | Epithelial cells of the proximal renal tubules | Temperature-inducible SV40 antigens + hTERT                                                                        | +   | Used in the creation of a bioartificial kidney                                                    | Preclinical in vitro                         | [103,105, 106] |
| Different immortalized hepatocytes | Adult hepatocytes, fetal hepatocytes           | SV40 antigens, native or temperature-inducible, HPV16 E6/E7 + hTERT, Cre/LoxP - controlled hTERT and SV40 antigens | +/- | Used in the creation of a bioartificial liver                                                     | Establishment, preclinical in vitro, in vivo | [113–123]      |
| Immortalized keratinocytes         | Skin keratinocytes                             | hTERT                                                                                                              | -   | Obtaining a model of human skin (use in practical medicine in the original study is not expected) | Preclinical in vitro                         | [125]          |

|                 |                                                                                |                  |   |                                                                                                                           |                         |           |
|-----------------|--------------------------------------------------------------------------------|------------------|---|---------------------------------------------------------------------------------------------------------------------------|-------------------------|-----------|
| MCEC,<br>hCE-TJ | Corneal<br>endotheliocytes<br>(MCEC),<br>corneal<br>epitheliocytes<br>(hCE-TJ) | SV40<br>antigens | - | Obtaining<br>models of<br>the cornea<br>(use in<br>practical<br>medicine in<br>original<br>studies is<br>not<br>expected) | Preclinical<br>in vitro | [126,127] |
| GB/hTERT<br>MSC | Mesenchymal<br>stem cells                                                      | hTERT            | - | For use in<br>an<br>implantable<br>device that<br>measures<br>glucose<br>levels                                           | Establish<br>ment       | [128]     |
